# Supplementary material for: The mixed network former effect in glasses: solid state NMR and XPS structural studies of the glass system (Na2O)x(BPO4)1−x
Source: Royal Society of Chemistry journal article supplement (doi:10.1039/c0cp01590c), 2011-01-01
Supplement: c0cp01590c.pdf [file c0cp01590c.pdf]

## Supplemental Materials

**Figure S1:** Peak deconvolution carried out for the O1s X-Ray photoelectron spectra of  $(\text{Na}_2\text{O})_x(\text{BPO}_4)_{1-x}$  glasses shown for two representative compositions.

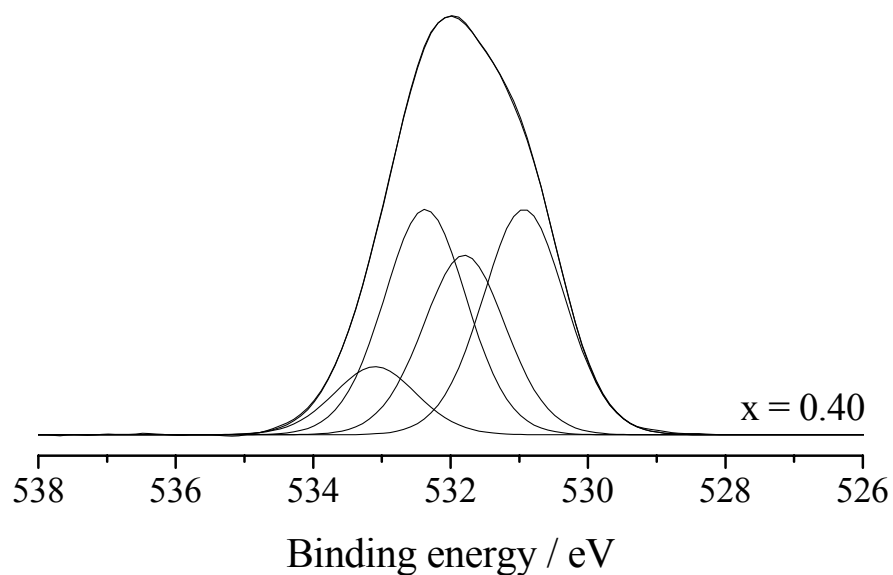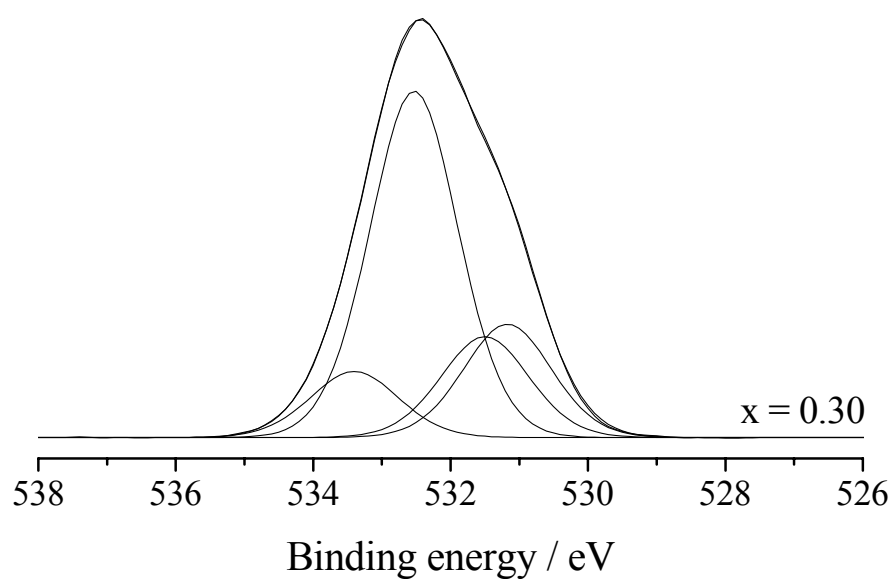

**Figure S2:** Exemplary deconvolution of the  $^{11}\text{B}$  MAS NMR spectrum of the glass with  $x = 0.30$ .

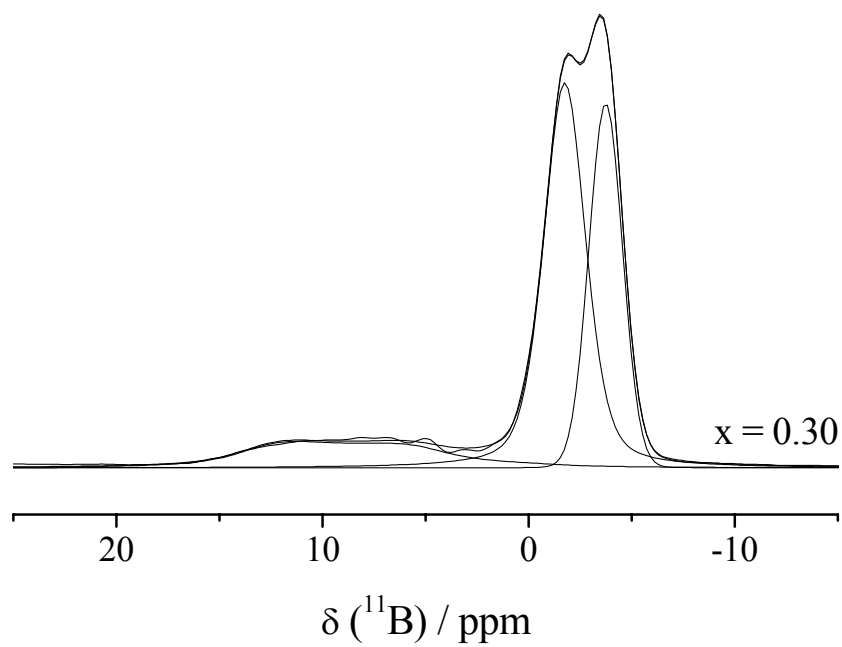

**Figure S3:** Deconvolution of the  $^{31}\text{P}$  MAS NMR spectra of representative  $(\text{Na}_2\text{O})_x(\text{BPO}_4)_{1-x}$  glasses.

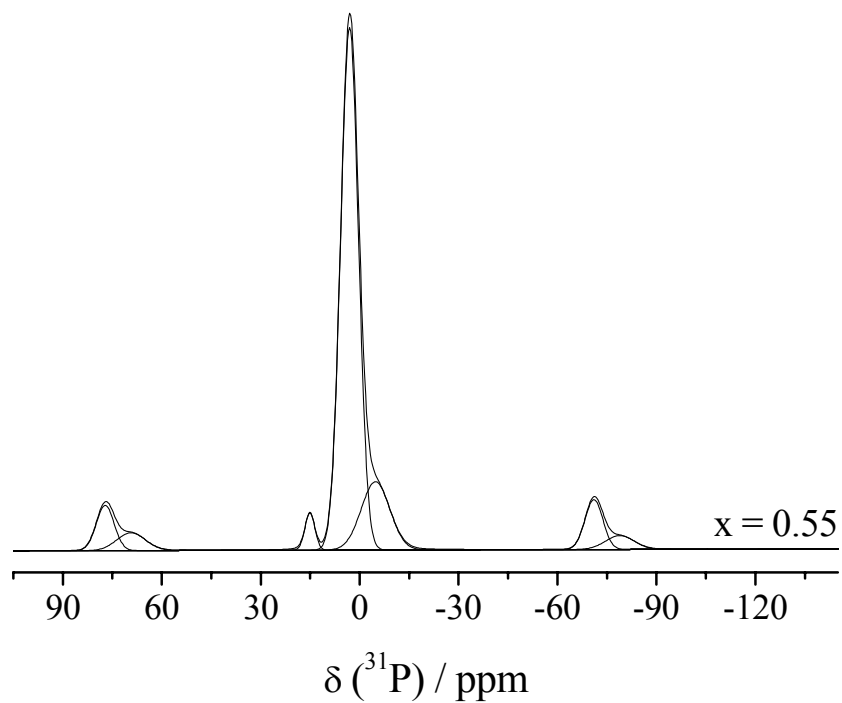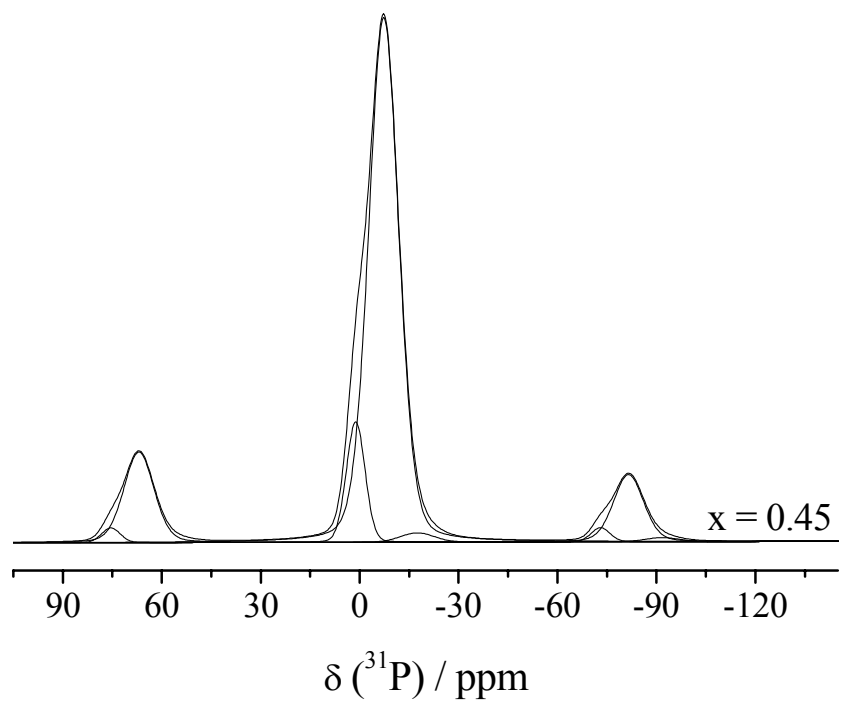

**Table S1:** Deconvolution results of the  $^{11}\text{B}$  TQMAS- and  $^{11}\text{B}$  SATRAS NMR spectra of sodium borophosphate glasses with compositions  $(\text{Na}_2\text{O})_x(\text{BPO}_4)_{1-x}$ .

| x    | $^{11}\text{B}$ TQMAS              |                                  |                           |                                    |                                    |                                 |                                 | $^{11}\text{B}$ SATRAS        |
|------|------------------------------------|----------------------------------|---------------------------|------------------------------------|------------------------------------|---------------------------------|---------------------------------|-------------------------------|
|      | $\text{B}^{(3)}_{\text{OP}}$       |                                  |                           | $\text{B}^{(4)}$                   |                                    |                                 |                                 | $\text{B}^{(4)}$              |
|      | $\delta /$<br>ppm<br>( $\pm 0.1$ ) | $C_Q /$<br>MHz<br>( $\pm 0.05$ ) | $\eta_Q$<br>( $\pm 0.1$ ) | $\delta /$<br>ppm<br>( $\pm 0.1$ ) | $\delta /$<br>ppm<br>( $\pm 0.1$ ) | SOQE<br>/ MHz<br>( $\pm 0.05$ ) | SOQE<br>/ MHz<br>( $\pm 0.05$ ) | $C_Q /$ MHz<br>( $\pm 0.05$ ) |
| 0.30 | 15.3                               | 2.6                              | 0.30                      | -1.39                              | -2.06                              | 0.726                           | 0.707                           | 0.822                         |
|      |                                    |                                  |                           | -3.80                              |                                    | 0.546                           |                                 |                               |
| 0.40 | 16.7                               | 2.6                              | 0.18                      | -0.96                              | -1.18                              | 0.746                           | 0.729                           | 0.842                         |
|      |                                    |                                  |                           | -3.41                              |                                    | 0.564                           |                                 |                               |
| 0.50 | 17.3                               | 2.6                              | 0.17                      | -0.27                              | -0.38                              | 0.766                           | 0.720                           | 0.720                         |
|      |                                    |                                  |                           | -3.05                              |                                    | 0.521                           |                                 |                               |
| 0.55 | 18.0                               | 2.6                              | 0.20                      | -0.02                              | -0.14                              | 0.629                           | 0.664                           | 0.650                         |
|      |                                    |                                  |                           | -2.83                              |                                    | 0.776                           |                                 |                               |
